# Supplementary material
Source: publisher figshare collection journal article supplement (https://acs.figshare.com/ndownloader/files/4504903)
Supplement: Supplementary file 1 [file 4504903]

## **Supporting Information**

### **A New Approach Toward Nanosized Ferrous Ferric Oxide and Fe<sub>3</sub>O<sub>4</sub>-doped**

### **Titanium Dioxide Photocatalysts**

*Wing Sze Tung and Walid. A. Daoud\**

School of Applied Sciences and Engineering, Monash University, Churchill, VIC 3842,

Australia

---

\* Corresponding Author:

School of Applied Sciences and Engineering, Monash University, Churchill, VIC 3842, Australia

Email: [Walid.Daoud@sci.monash.edu.au](mailto:Walid.Daoud@sci.monash.edu.au)

Telephone: + 61 3 990 26411

Facsimile: + 61 3 990 26738

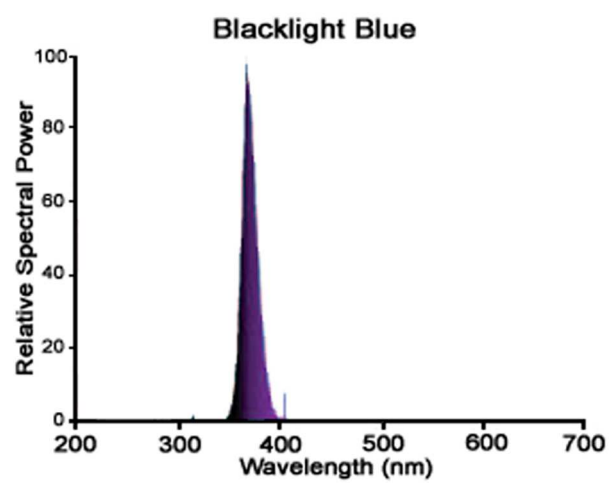

**Fig S1.** Spectral irradiation of UV light source.

**Table S1.** Atomic absorption study of FO, TF1 and TF2 before and after photocatalytic degradation.

|                  | FO     |       | TF1    |       | TF2    |       |
|------------------|--------|-------|--------|-------|--------|-------|
|                  | Before | After | Before | After | Before | After |
| Iron Atom (mg/L) | 7      | 123   | 23     | 39    | 14     | 34    |
| Change (%)       |        | 1657  |        | 71    |        | 145   |

### Experimental Procedure for Atomic Absorption Spectrometry

The released iron from the iron-containing catalysts in methylene blue solution was measured after the dynamic wet-state photocatalytic evaluation using Perkin-Elmer Model 3030 atomic absorption spectrometer (Perkin-Elmer Pty Ltd., Australia).
